# Supplementary material for: A G1‐like state allows HIV‐1 to bypass SAMHD1 restriction in macrophages
Source: PubMed Central journal article supplement (PMC5331754; doi:10.15252/embj.201696025), 2017-01-25
Supplement: EMBJ-36-604-s001.pdf [file EMBJ-36-604-s001.pdf]

## Expanded View Figures

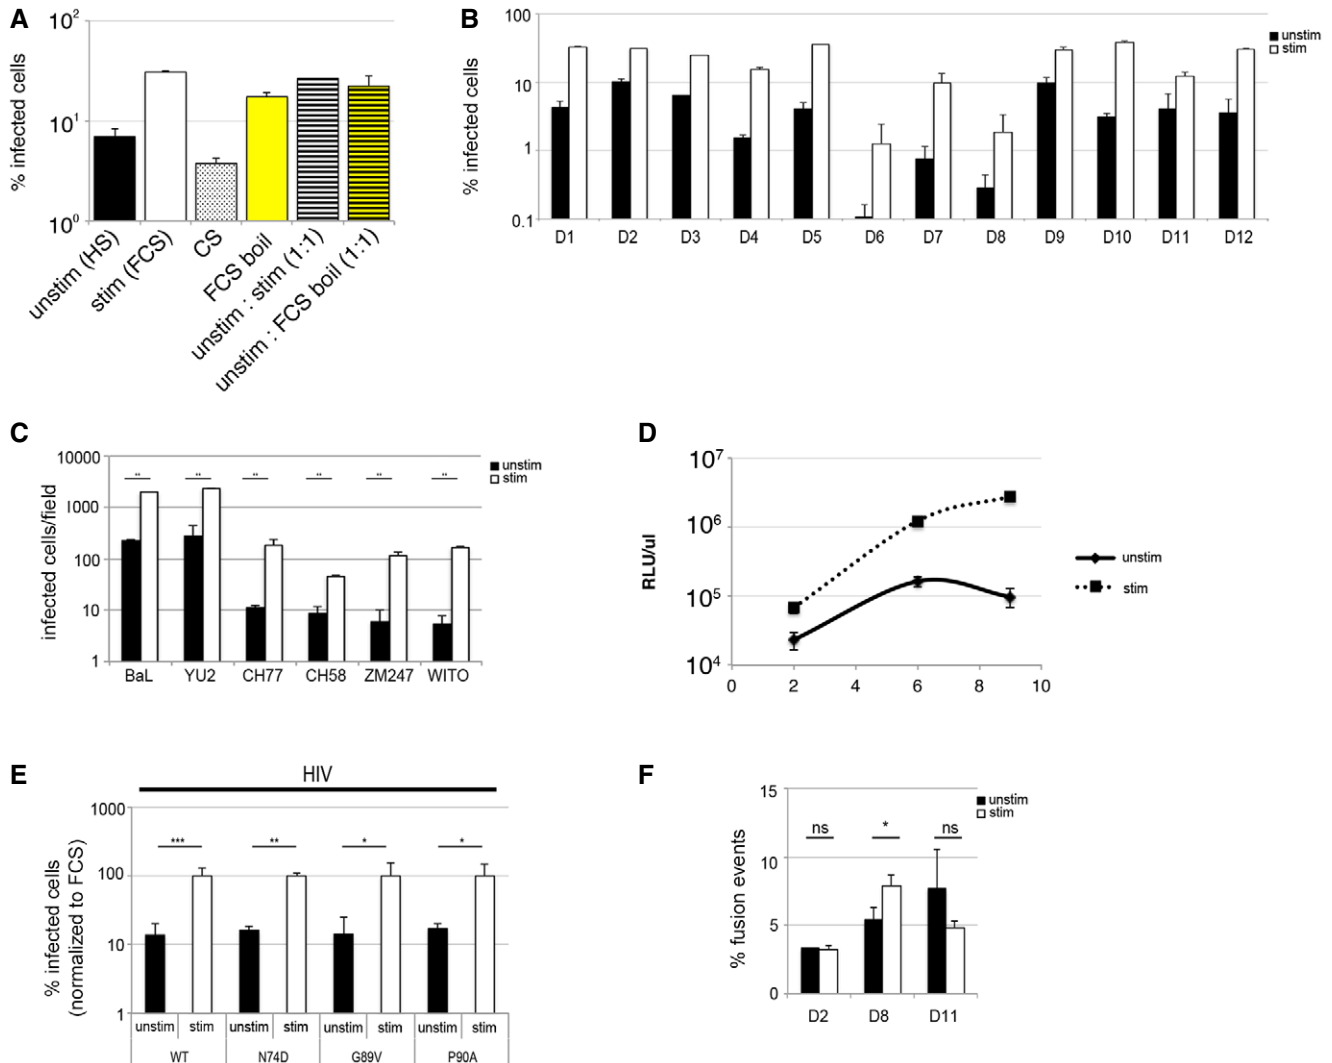

**Figure EV1. Enhanced susceptibility to HIV-1 infection in stimulated monocyte-derived macrophages.**

**A** MDM were differentiated in RPMI complemented with MCSF and 10% human serum for 3 days and cultured for additional 3 days in RPMI complemented with 10% human serum (unstim), 10% foetal calf serum (stim), 10% charcoal-stripped FCS (CS), 10% FCS boiled for 5 min and filtrated through 0.45- $\mu$ m filter (FCS boil), 1:1 mix of 10% HS and FCS (unstim:stim 1:1), 1:1 mix of 10% HS and FCS boiled for 5 min (unstim:FCS boil 1:1) and then infected with VSV-G-pseudotyped HIV-1-expressing GFP. The percentage of infected cells was detected 48 h post-infection by FACS.

**B** MDM from 12 different donors (D1-D12) were infected with VSV-G-pseudotyped HIV-1 GFP; the percentage of infected cells was detected 48 h post-infection by FACS.

**C** Single round of infection of MDM with a panel of full-length HIV-1 viruses (macrophage tropic viruses: BaL and YU2; clinical isolates: CH77, CH58, ZM247, WITO). Cells were stained for intracellular p24 protein 48 h post-infection and numbers of infected cells quantified by light microscopy.

**D** The titres of released viruses were determined by infection of the indicator cells HeLa T2M-bl. Culture supernatants from BaL-infected MDM were harvest at day 2, 6 and 9 post-infection, filtered and used to infect T2M-bl cells. Luciferase activity of the T2M-bl cells was measured 24 h post-infection.

**E** MDM were infected with VSV-G-pseudotyped GFP viruses (wt HIV-1; HIV-1 capsid mutants P90A, N74D, G89V), and the percentage of infected cells was detected by FACS 48 h post-infection. All viruses displayed similar percentage of infection (which was normalised to infection in stimulated macrophages ~100%).

**F** MDM were infected with equal amounts of p24 (50 ng) of BlaM-Vpr-containing viruses for 4 h. Cells were loaded with CCF2/AM dye, and fusion events were detected by flow cytometry using BD LSR Fortessa and gated from 10,000 cells.

Data information: Graphs are average of  $n \geq 3$ , mean  $\pm$  s.e.m.; \* $P$ -value  $\leq 0.05$ ; \*\* $P$ -value  $\leq 0.01$ ; \*\*\* $P$ -value  $\leq 0.001$ , unpaired  $t$ -test.

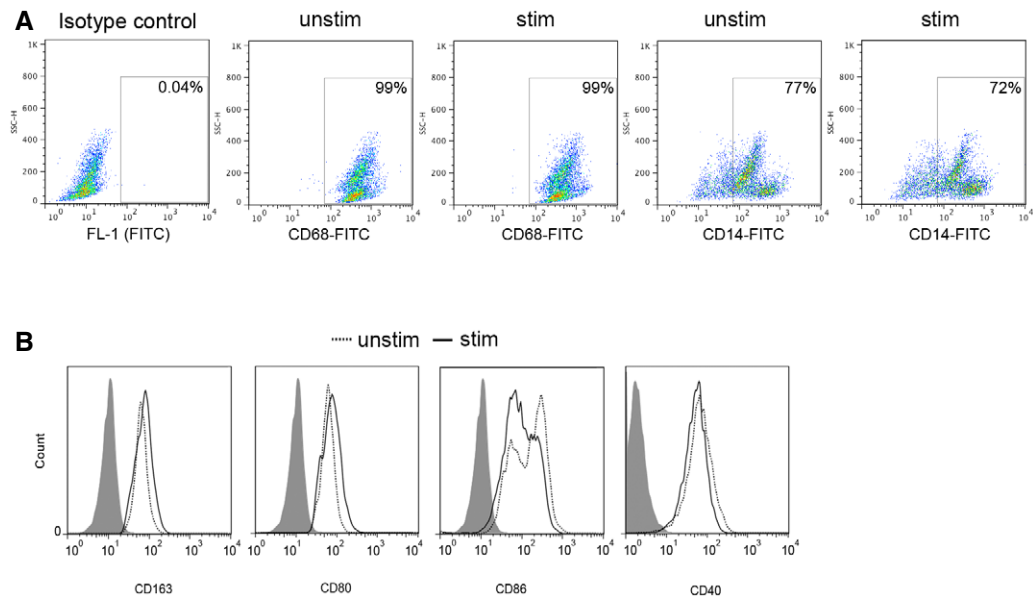

**Figure EV2. Expression of macrophage cell surface markers is unaffected by stimulatory conditions.**

A, B Stimulated or unstimulated MDM were stained for classical macrophage markers (CD68, CD14) and M1 and M2 macrophage markers (CD163, CD80, CD86 and CD40) and analysed by FACS.

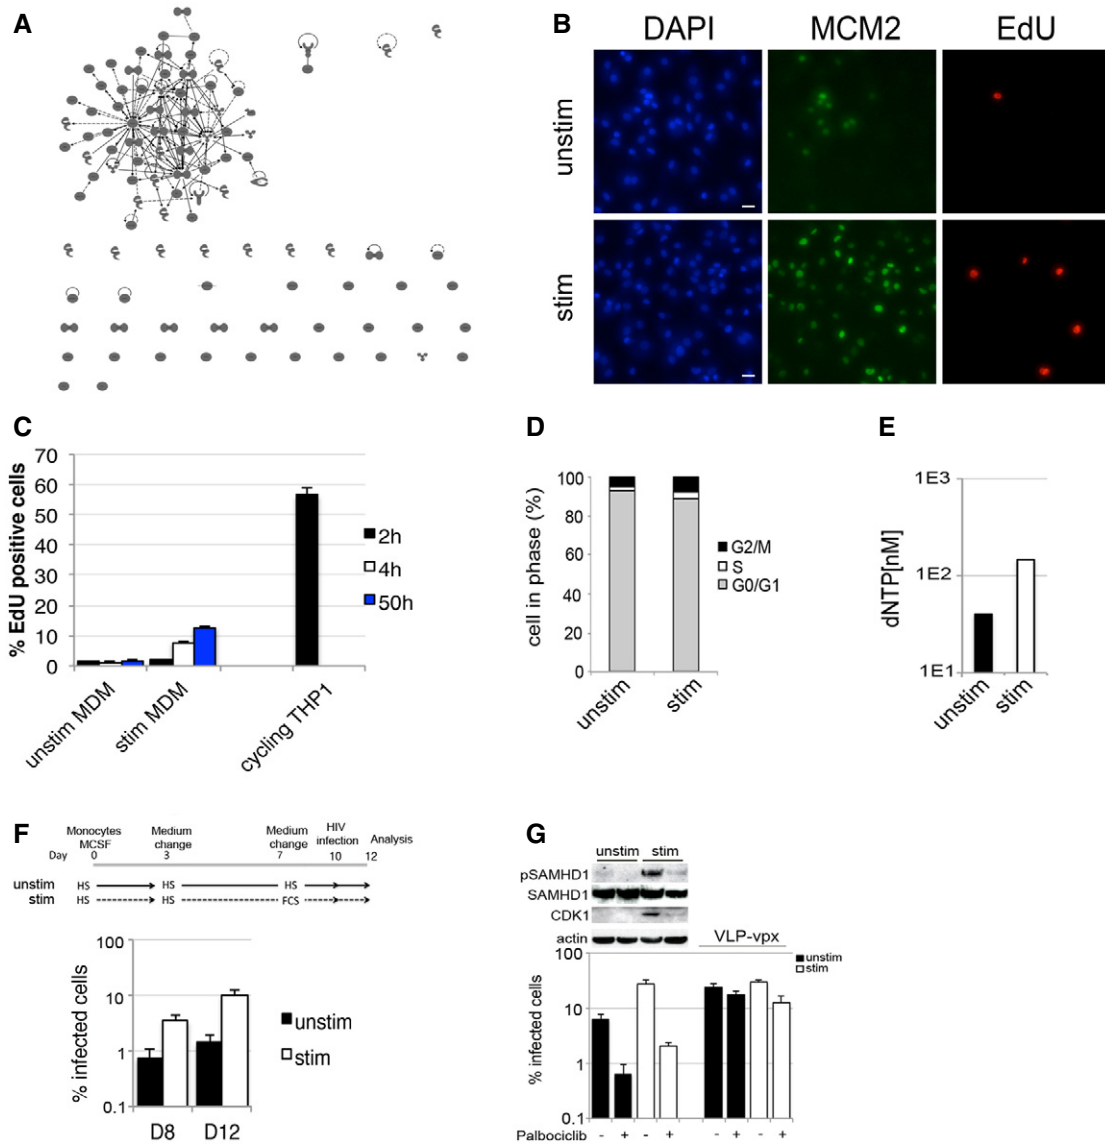

**Figure EV3. MDM can be manipulated to transition between G0- and G1-like phase.**

- A Ingenuity pathway interaction analysis of nuclear proteins that show significant transcriptional upregulation in stimulated MDM compared to unstimulated MDM. The figure demonstrates a single dominant cluster of interacting proteins.
- B Example of acquisition by Hermes WiScan cell-imaging system, an automated microscopic platform. MDM were labelled for nuclei, MCM2 and active DNA synthesis using Click-iT® EdU Alexa Fluor® 488 Imaging Kit. Scale bars: 10 µm.
- C MDM were treated for 2, 4 and 50 h with 10 µM EdU to detect active DNA synthesis using Click-iT® EdU Alexa Fluor® 488 Imaging Kit. The percentage of EdU-positive cells was quantified by FACS.
- D Quantification of cell cycle phases from PI labelling.
- E dNTP levels in stimulated and unstimulated MDM.
- F MDM differentiated and cultured in RPMI complemented with MCSF and 10% human serum for 7 days were changed into stimulatory medium (10% FCS) and cultured for additional 3 days. Cells were infected with VSV-G-pseudotyped HIV-1 GFP and the percentage of infected cells detected 48 h post-infection by FACS.
- G MDM were treated with the CDK4/6 inhibitor Palbociclib (1 µM) 18 h before infection and infected with VSV-G-pseudotyped GFP virus; VLP-vpx was added at the time of infection. Cells from this experiment were lysed and used for immunoblotting.

Data information: Cells in each experiment were recorded and analysed using Hermes WiScan cell-imaging system, ImageJ or FACS ( $n \geq 3$ , mean  $\pm$  s.e.m.).

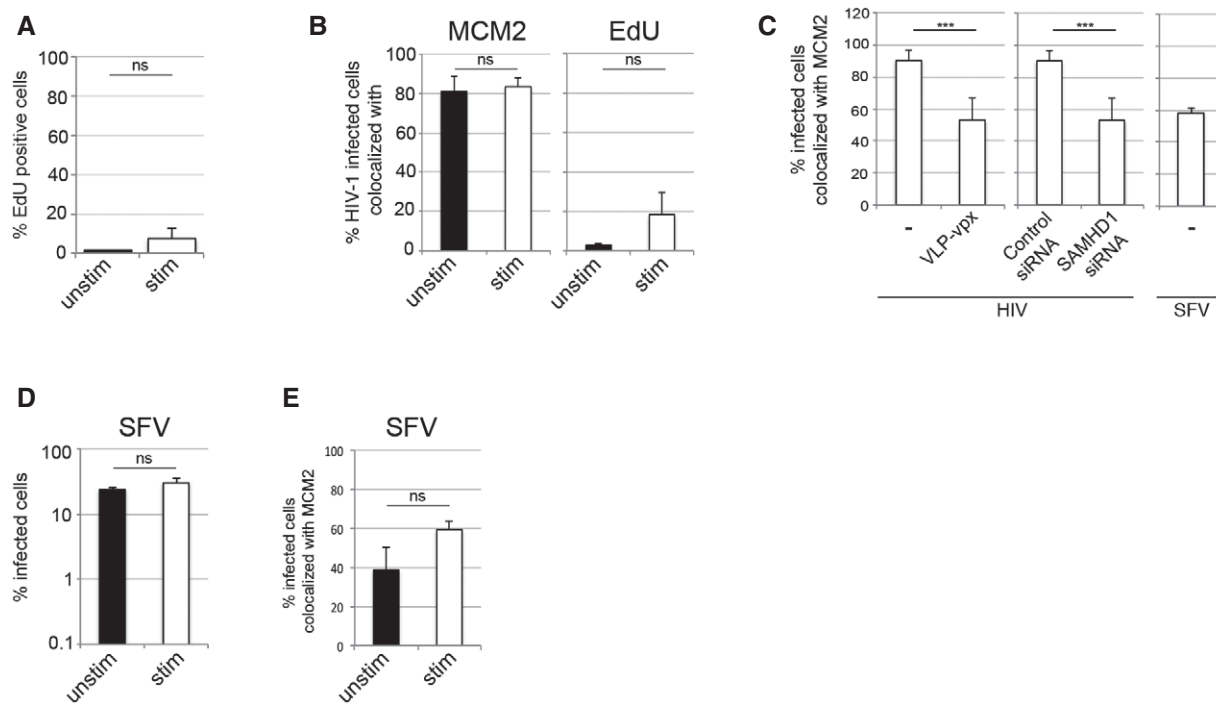

**Figure EV4. MDM in a G1-like phase are highly permissive to HIV-1 infection.**

- A MDM were cultured in the presence of 5  $\mu$ M EdU for 72 h and labelled using Click-iT<sup>®</sup> EdU Alexa Fluor<sup>®</sup> 488 Imaging Kit. The percentage of EdU-positive cells was detected by using Hermes WiScan and ImageJ.
- B, C MDM were infected with VSV-G-pseudotyped HIV-1 GFP or Semliki Forest virus (SFV) stained and recorded 48 h post-infection and analysed for co-localisation between infection and MCM2 protein or EdU incorporation (active DNA synthesis, EdU was added to cells at the time of infection). Co-localisation analysis between infection and MCM2 in the presence or absence of SAMHD1 protein is also shown.
- D MDM infection by SFV.
- E Co-localisation between SFV infection and MCM2 protein.

Data information: On average,  $10^4$  cells in each experiment were recorded and analysed using Hermes WiScan cell-imaging system and ImageJ ( $n \geq 3$ , mean  $\pm$  s.e.m.; \*\*\* $P$ -value  $\leq 0.001$ , unpaired  $t$ -test).

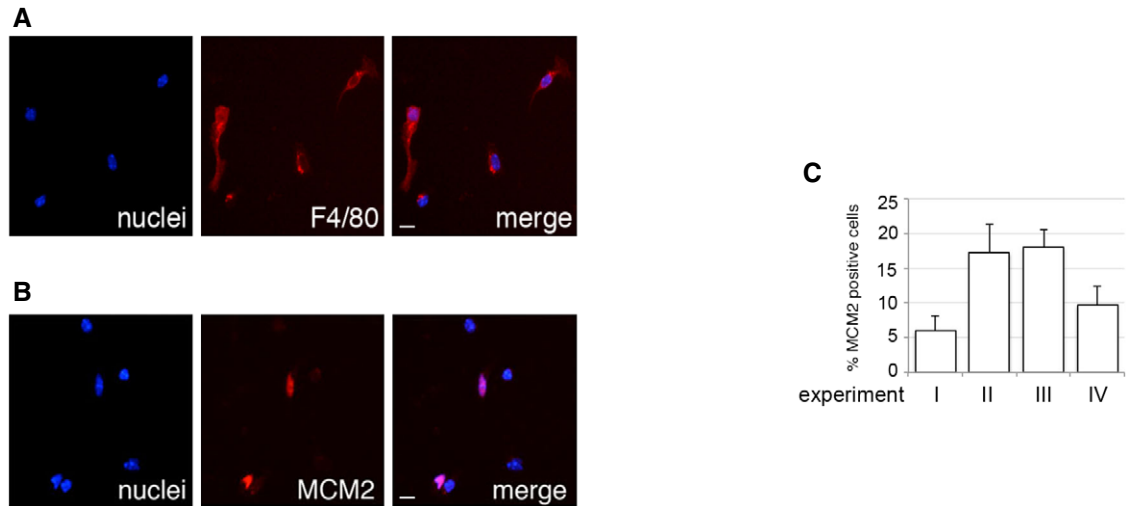

**Figure EV5. Microglia can be observed in a G1-like phase.**

- A, B Microglia isolated from 8- to 12-week-old CD1 mice were stained for the macrophage markers (A) F4/80 and (B) MCM2 4 h after isolation. Scale bars: 10  $\mu\text{m}$ .
- C Graph shows the percentage of MCM2-positive cells from four independent experiments. On average,  $2 \times 10^3$  cells in each experiment were recorded and analysed using Hermes WiScan cell-imaging system and ImageJ (mean  $\pm$  s.e.m.).

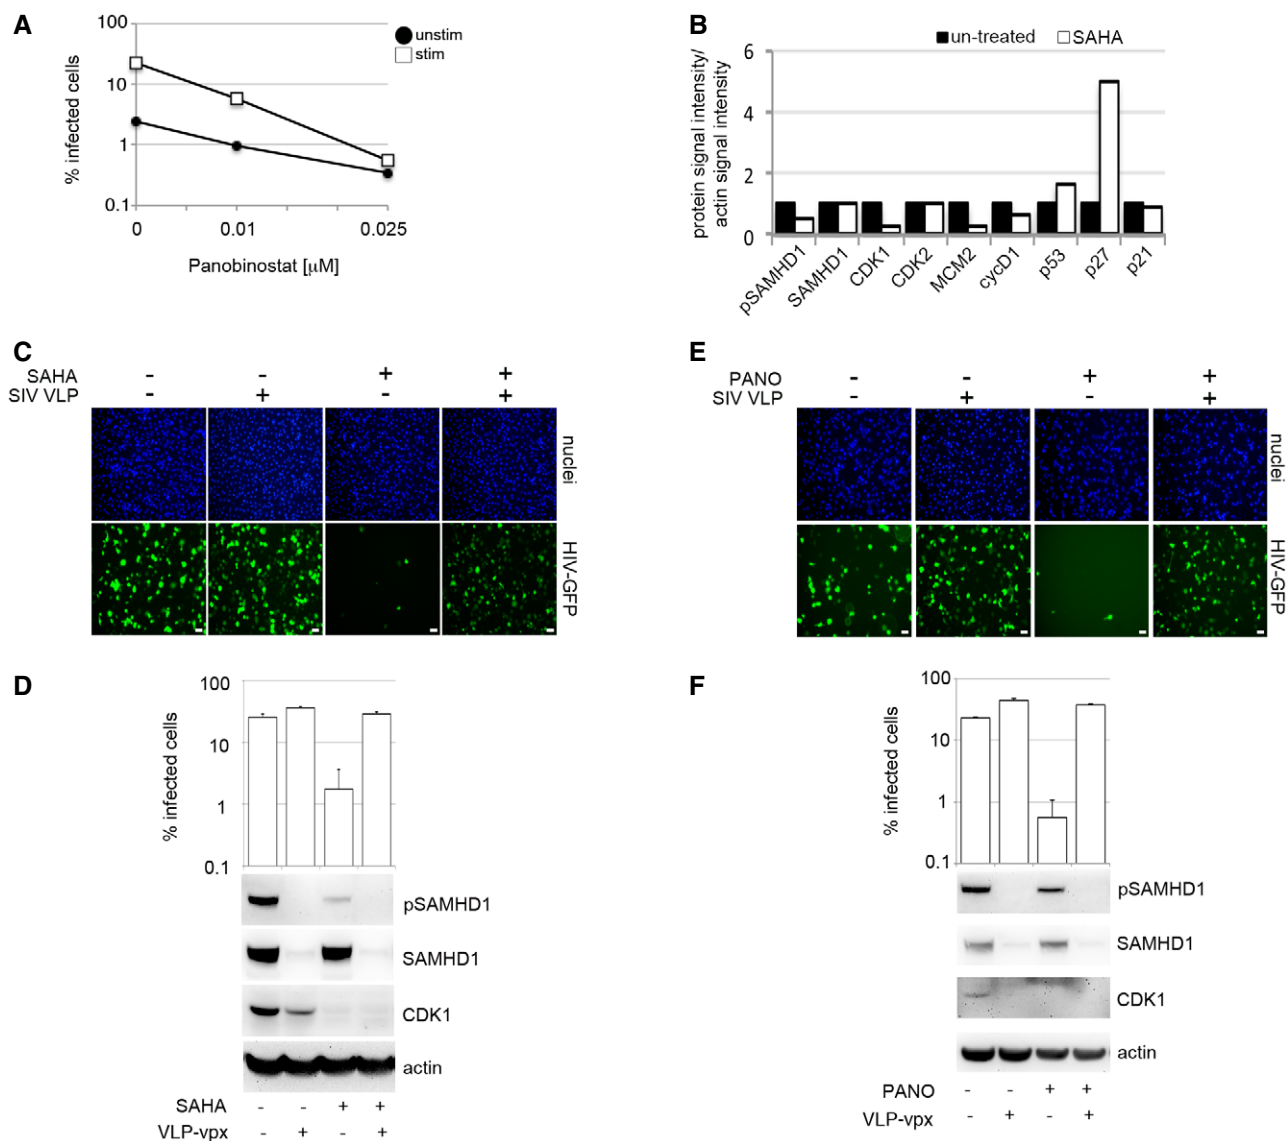

**Figure EV6. HDAC inhibitor blockade of HIV-1 infection is SAMHD1-dependent.**

A MDM were treated with panobinostat (PANO) 18 h before infection with VSV-G-pseudotyped HIV-1 GFP. The percentage of infected cells was detected by FACS 48 h post-infection.

B Quantification of specific protein band intensities from the immunoblot in Fig 5D using a CCD camera. Intensities of proteins bands were normalised to intensity of the actin protein band.

C MDM were treated with 1  $\mu$ M SAHA (Vorinostat), and then recorded and analysed for infection (VSV-G HIV-GFP) using Hermes WiScan. Scale bars: 20  $\mu$ m.

D MDM were treated with 1  $\mu$ M SAHA (Vorinostat) and co-infected with VSV-G-pseudotyped HIV-1 GFP and VLP-vpx. Cells from a representative donor were lysed and used for immunoblotting. The percentage of infected cells was detected by Hermes WiScan.

E MDM were treated with 0.025  $\mu$ M panobinostat and then recorded and analysed for infection (VSV-G HIV-GFP) using Hermes WiScan. Scale bars: 20  $\mu$ m.

F MDM were treated with 0.025  $\mu$ M panobinostat and co-infected with VSV-G-pseudotyped HIV-1 GFP and VLP-vpx. Cells from a representative donor were lysed and used for immunoblotting. The percentage of infected cells was detected by Hermes WiScan.

Data information: On average,  $10^4$  cells in each experiment were recorded and analysed using Hermes WiScan cell-imaging system and ImageJ ( $n \geq 3$ , mean  $\pm$  s.e.m.). Source data are available online for this figure.
