# Supplementary material for: A G1‐like state allows HIV‐1 to bypass SAMHD1 restriction in macrophages
Source: PubMed Central journal article supplement (PMC5331754; doi:10.15252/embj.201696025), 2017-01-25

Fig 1G

CDK1

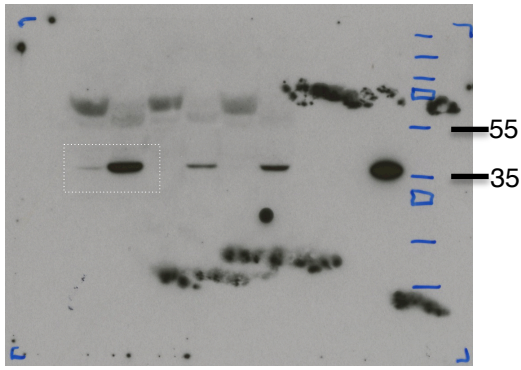

CDK4

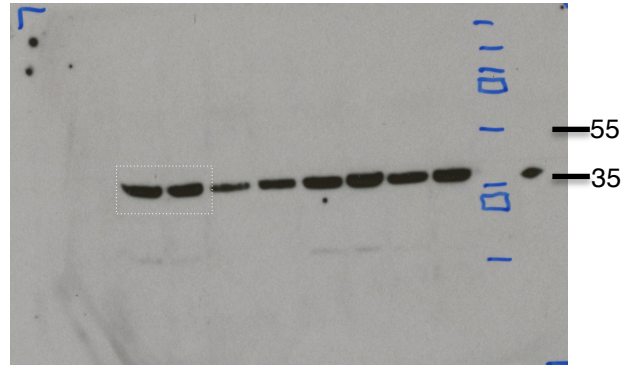

CDK2

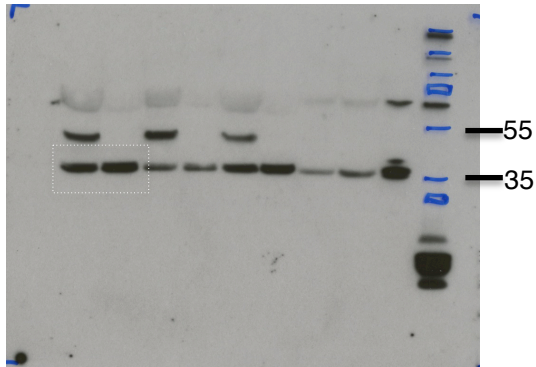

CDK6

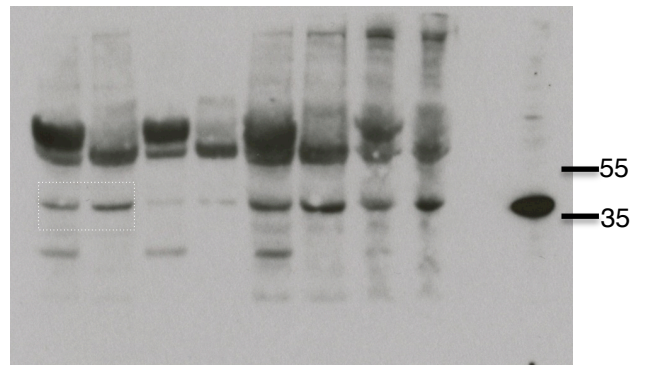

actin

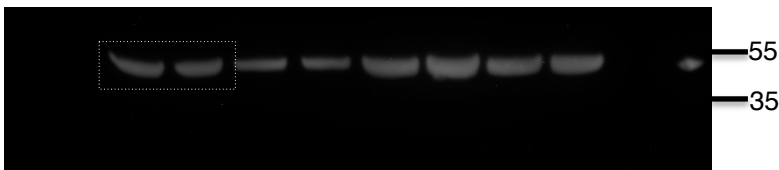

MCM2/SAMHD1

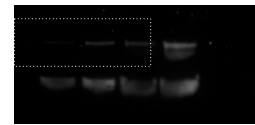

Cyclin D1

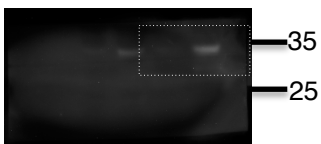

tubulin, geminin

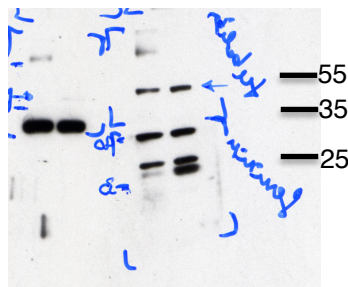

Cyclin E

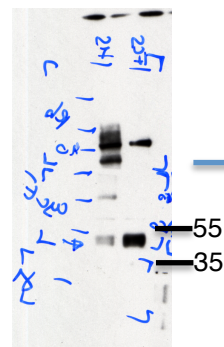

p27, cyclin D3

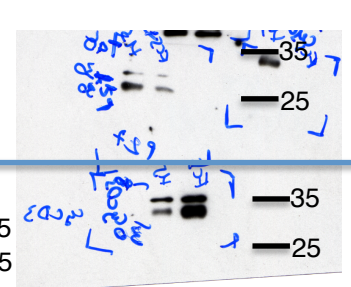

Cyclin A

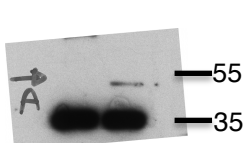

E2F6

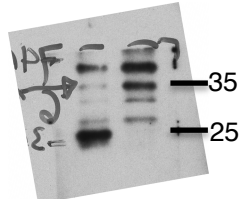

Supplement: EMBJ-36-604-s004.pdf [file EMBJ-36-604-s004.pdf]
