# Supplementary material for: A G1‐like state allows HIV‐1 to bypass SAMHD1 restriction in macrophages
Source: PubMed Central journal article supplement (PMC5331754; doi:10.15252/embj.201696025), 2017-01-25

Fig 2 A

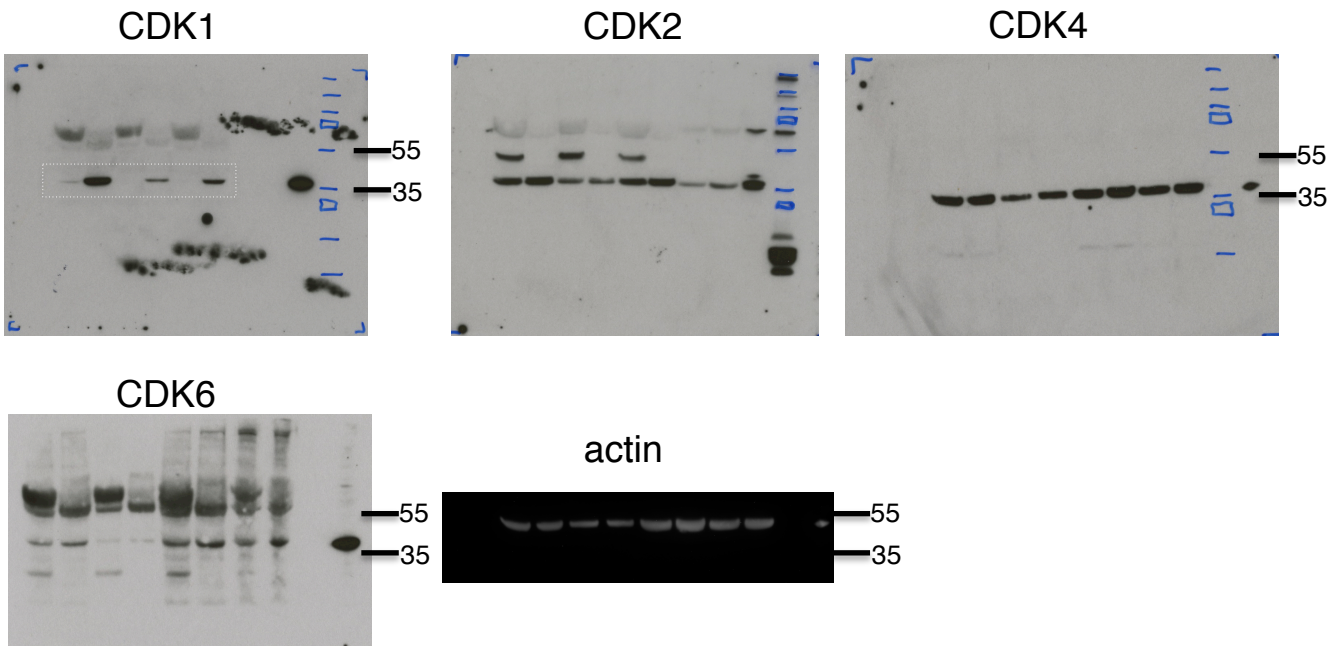

Fig 2 B

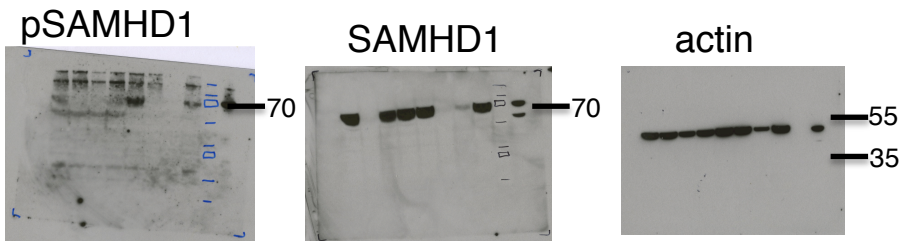

Fig 2C

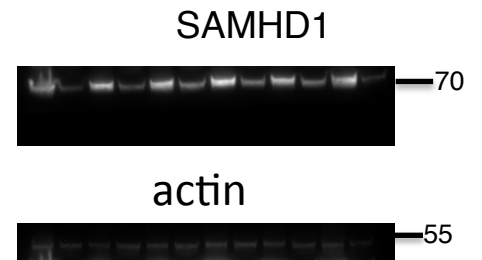

Fig 2 E and I

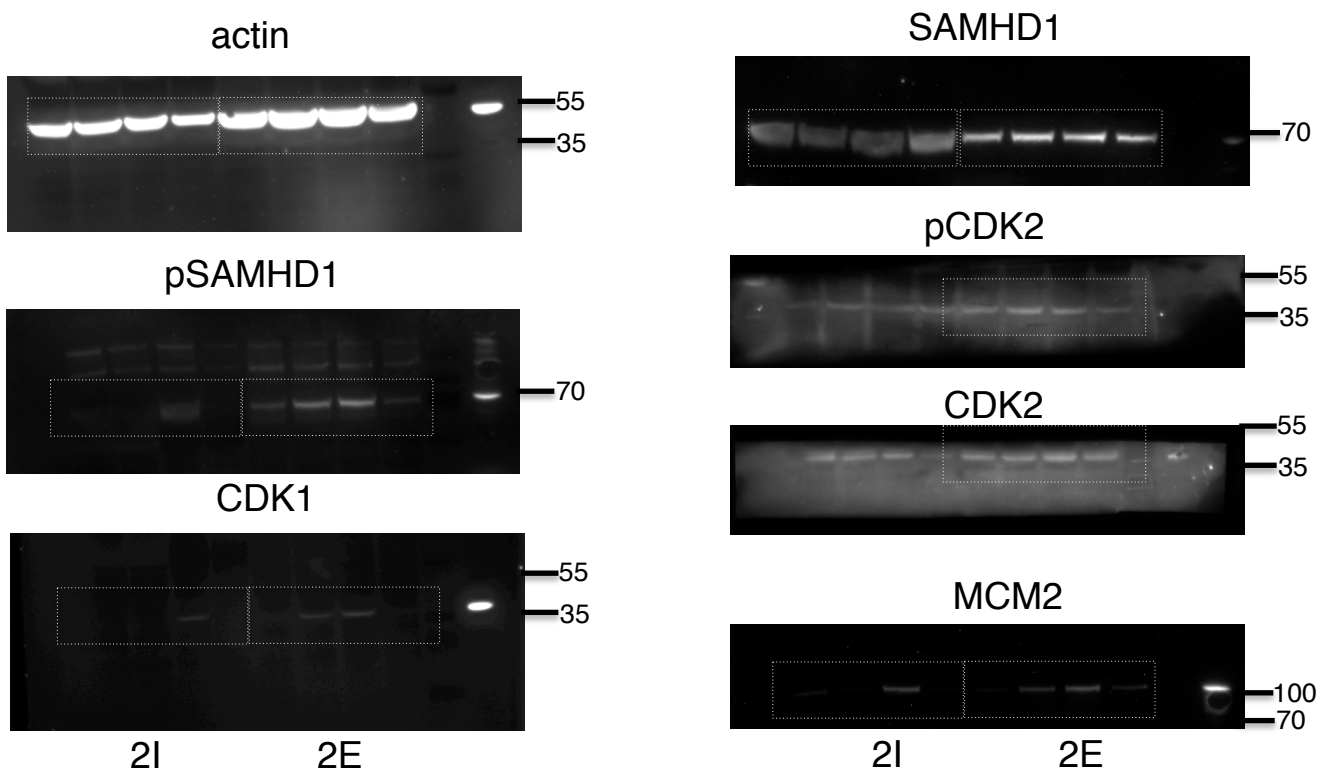

Supplement: EMBJ-36-604-s005.pdf [file EMBJ-36-604-s005.pdf]
