# Supplementary material for: A G1‐like state allows HIV‐1 to bypass SAMHD1 restriction in macrophages
Source: PubMed Central journal article supplement (PMC5331754; doi:10.15252/embj.201696025), 2017-01-25

Fig 5D

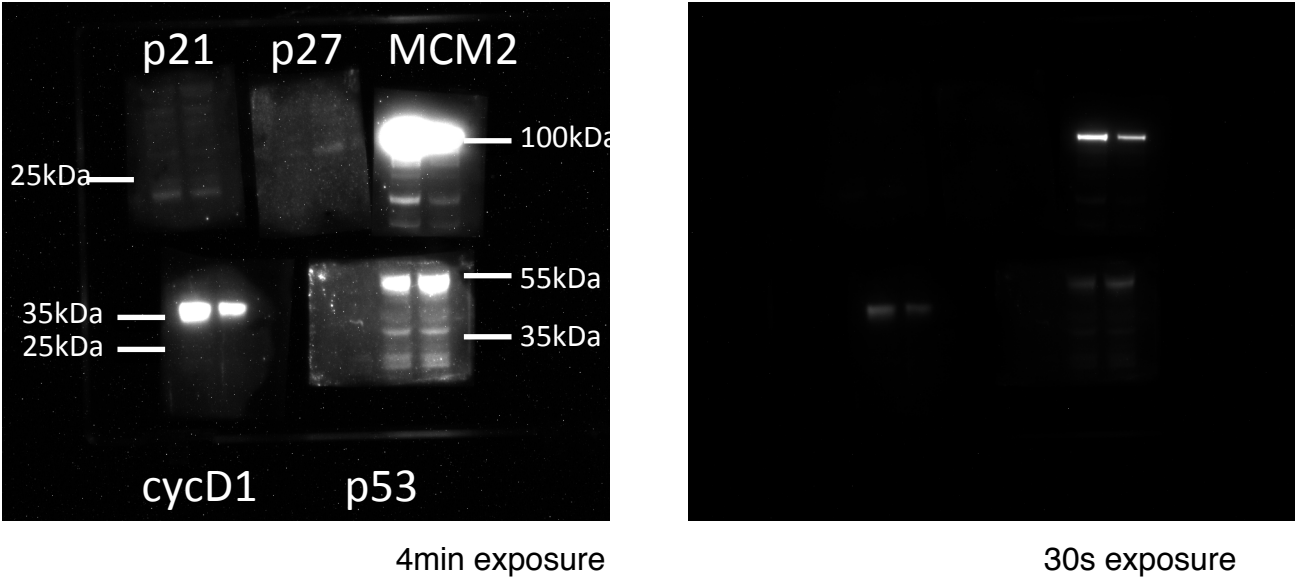

Fig 5E

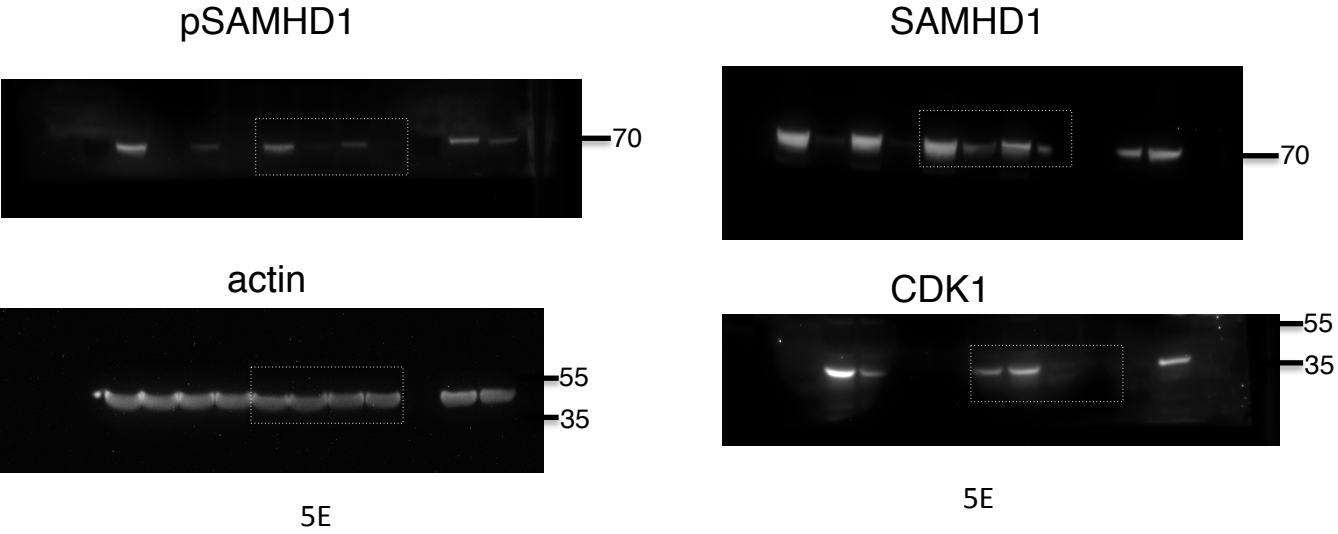

Supplement: EMBJ-36-604-s006.pdf [file EMBJ-36-604-s006.pdf]
